# Supplementary material
Source: PubMed Central journal article supplement (PMC1360218)
Supplement: NIHMS4037-supplement-Supp_fig_1.pdf [file NIHMS4037-supplement-Supp_fig_1.pdf]

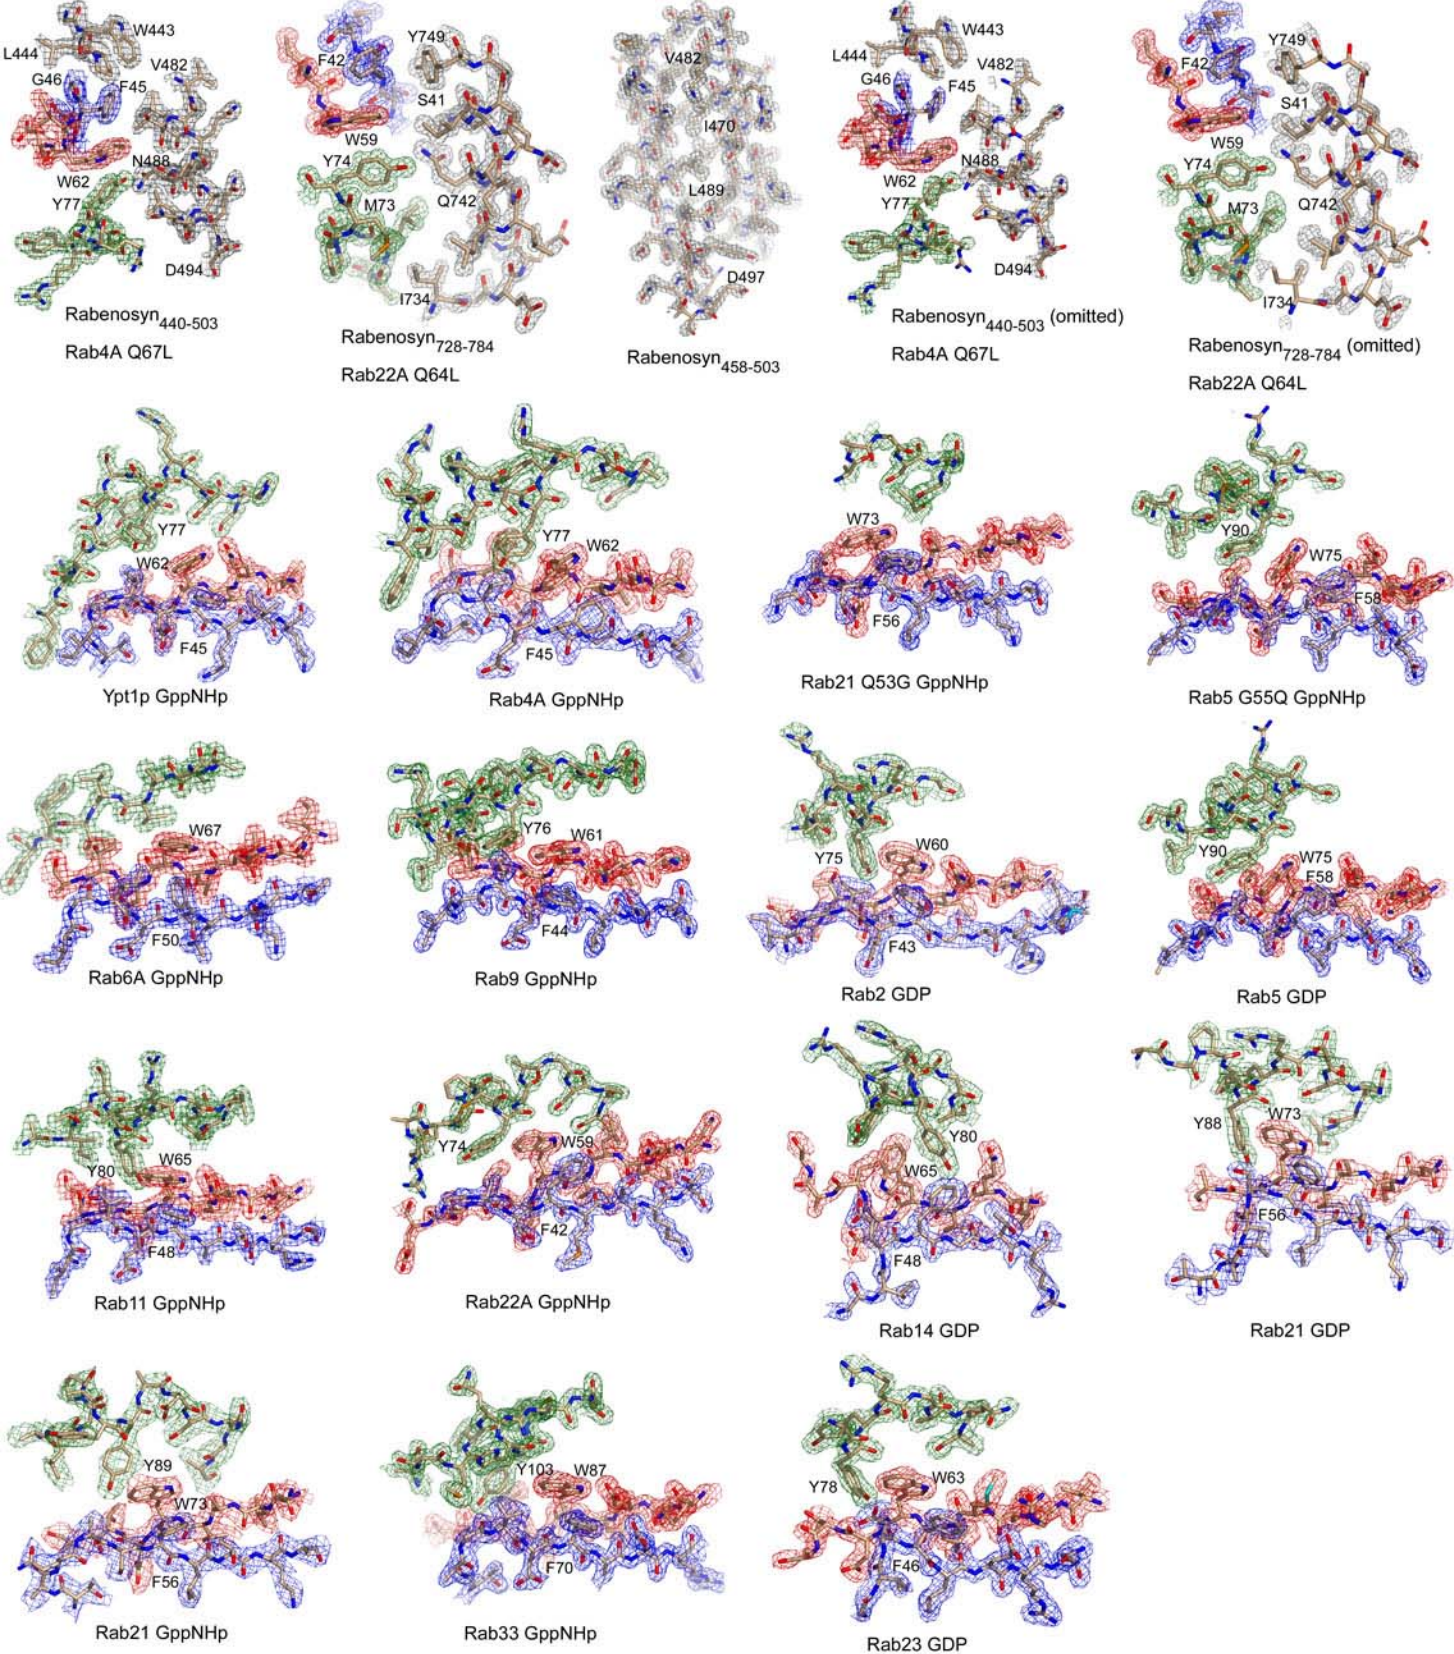

**Supplementary Figure 1.** Electron density for functionally relevant regions

Final refined models and  $\sigma_A$ -weighted  $2F_o - F_c$  electron density in the vicinity of the switch I (blue), interswitch (red), and switch II (green) regions as well as Rabenosyn-5 (gray). Maps were calculated with phases from the final refined models and contoured at  $1.2 \sigma$ . Omit maps (top right) were calculated following simulated annealing at 1000 °K and contoured at  $1.0 \sigma$ .
