# Supplementary material
Source: PubMed Central journal article supplement (PMC1360218)
Supplement: NIHMS4037-supplement-Supp_fig_5.pdf [file NIHMS4037-supplement-Supp_fig_5.pdf]

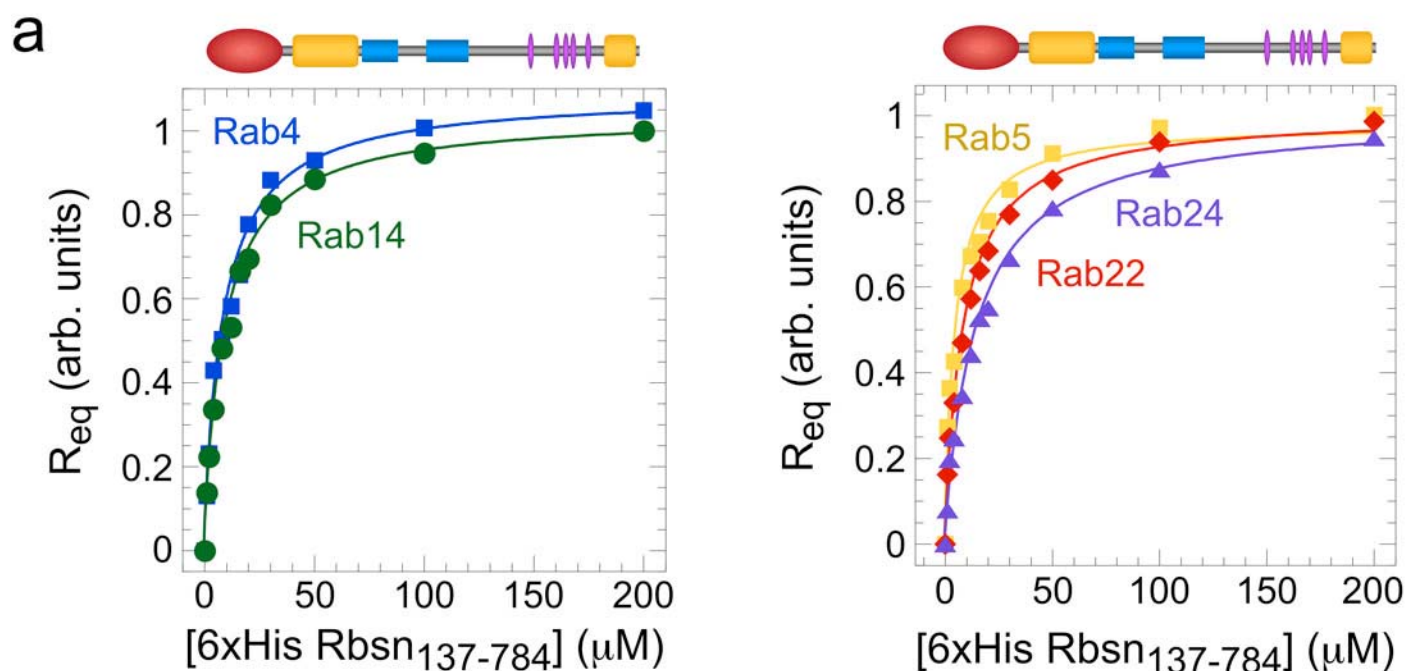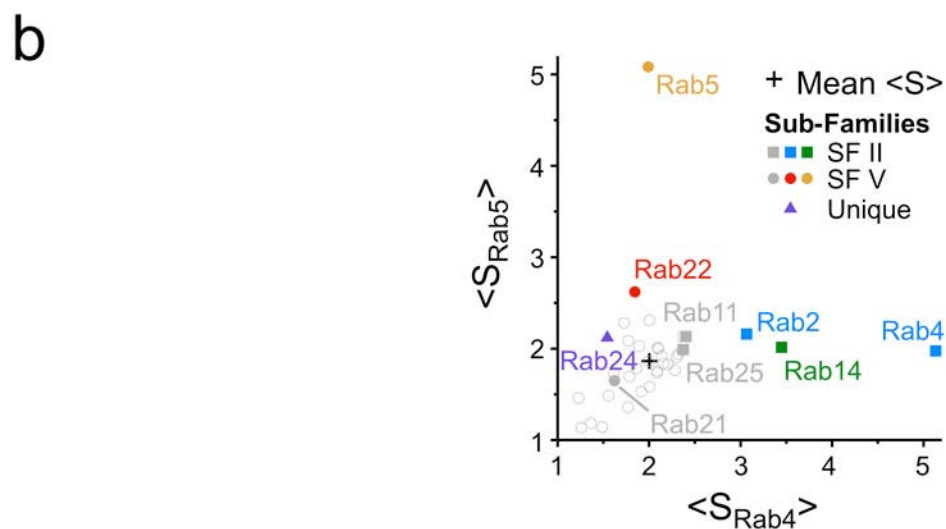

**Supplementary Figure 5.** Quantitative family-wide analysis of Rab-effector specificity  
**a**, Concentration dependence of the equilibrium SPR signal ( $R_{eq}$ ) for the binding of 6xHis Rbsn<sub>137-784</sub> to GST fusions of Rab4 and Rab14 (left) or Rab5, Rab22, and Rab24 (right). **b**, Correlation of interaction specificity with sequence similarity.  $\langle S_{Rab4} \rangle$  and  $\langle S_{Rab5} \rangle$  represent average log odds substitution scores from the Blosum 62 matrix for comparisons with Rab4 and Rab5, respectively.
