# Supplementary material
Source: PubMed Central journal article supplement (PMC1360218)
Supplement: NIHMS4037-supplement-Supp_fig_6.pdf [file NIHMS4037-supplement-Supp_fig_6.pdf]

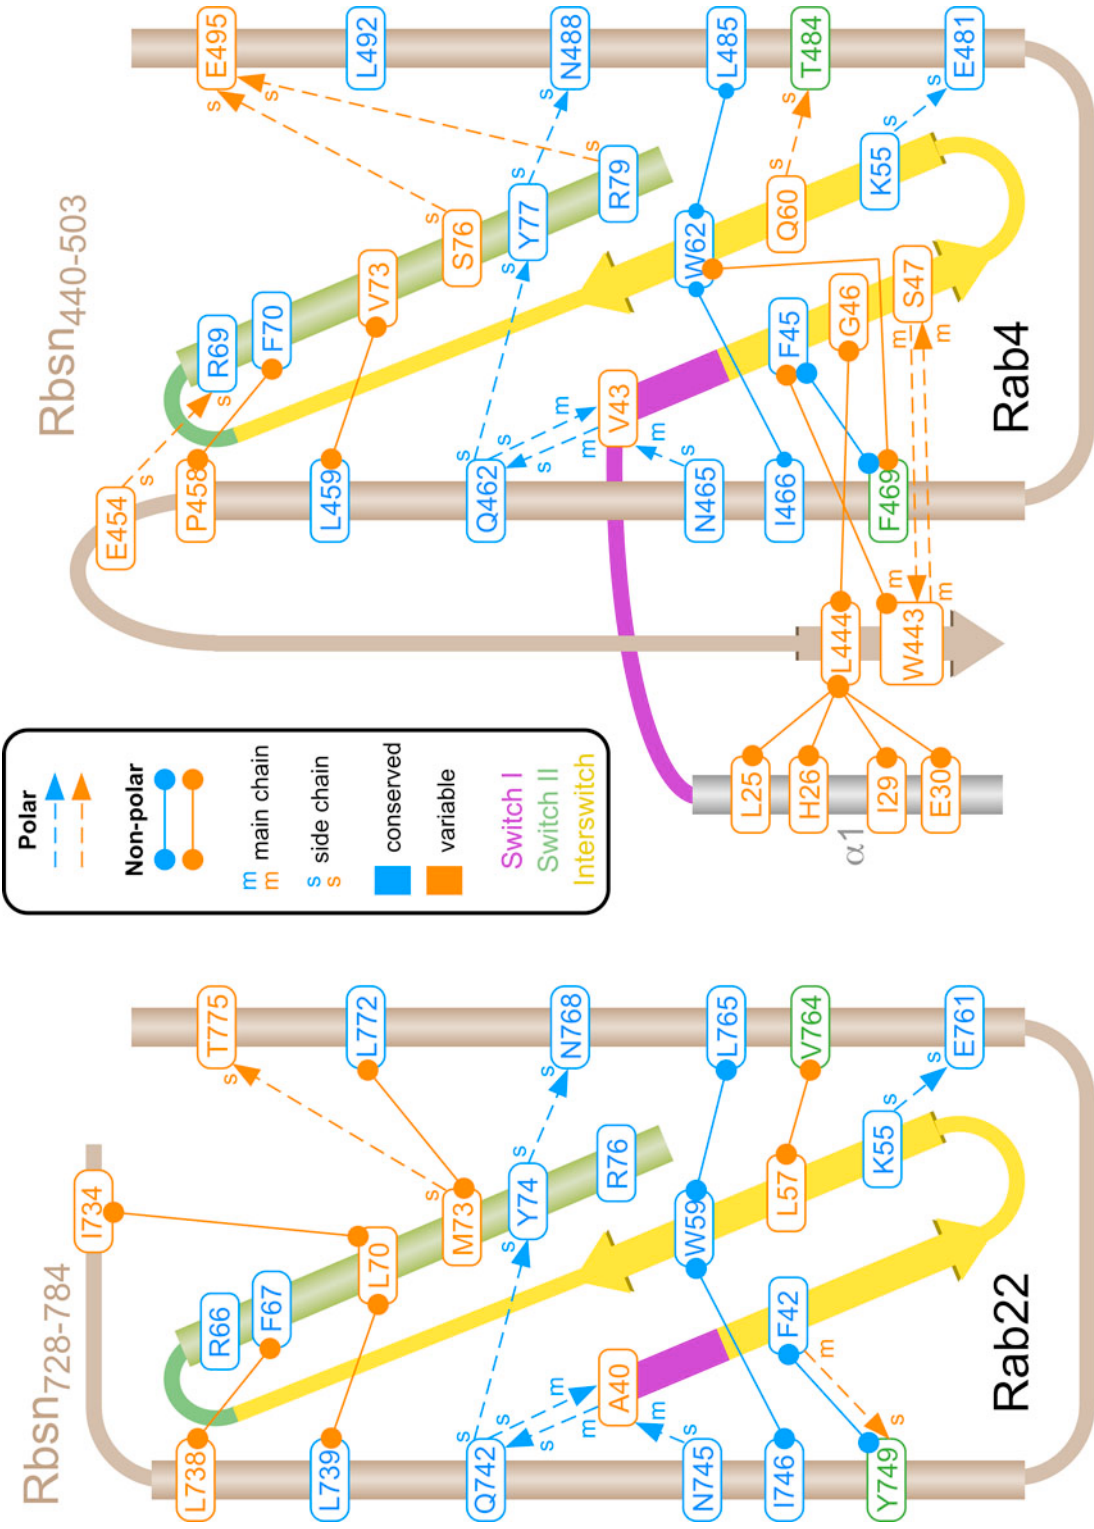

**Supplementary Figure 6.** Schematic diagram of intermolecular interactions in the Rab22-Rbsn<sub>728-784</sub> complex (left) and Rab4-Rbsn<sub>440-503</sub> complex (right).
