# Supplementary material
Source: PubMed Central journal article supplement (PMC1360218)
Supplement: NIHMS4037-supplement-Supp_fig_7.pdf [file NIHMS4037-supplement-Supp_fig_7.pdf]

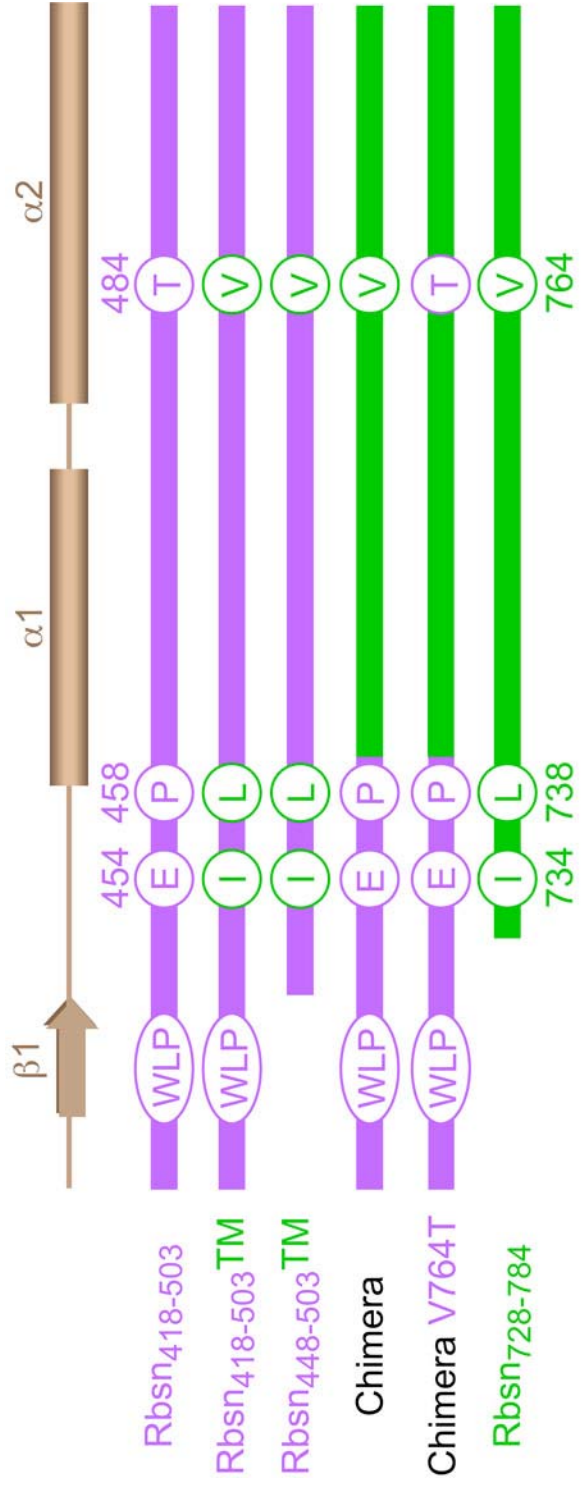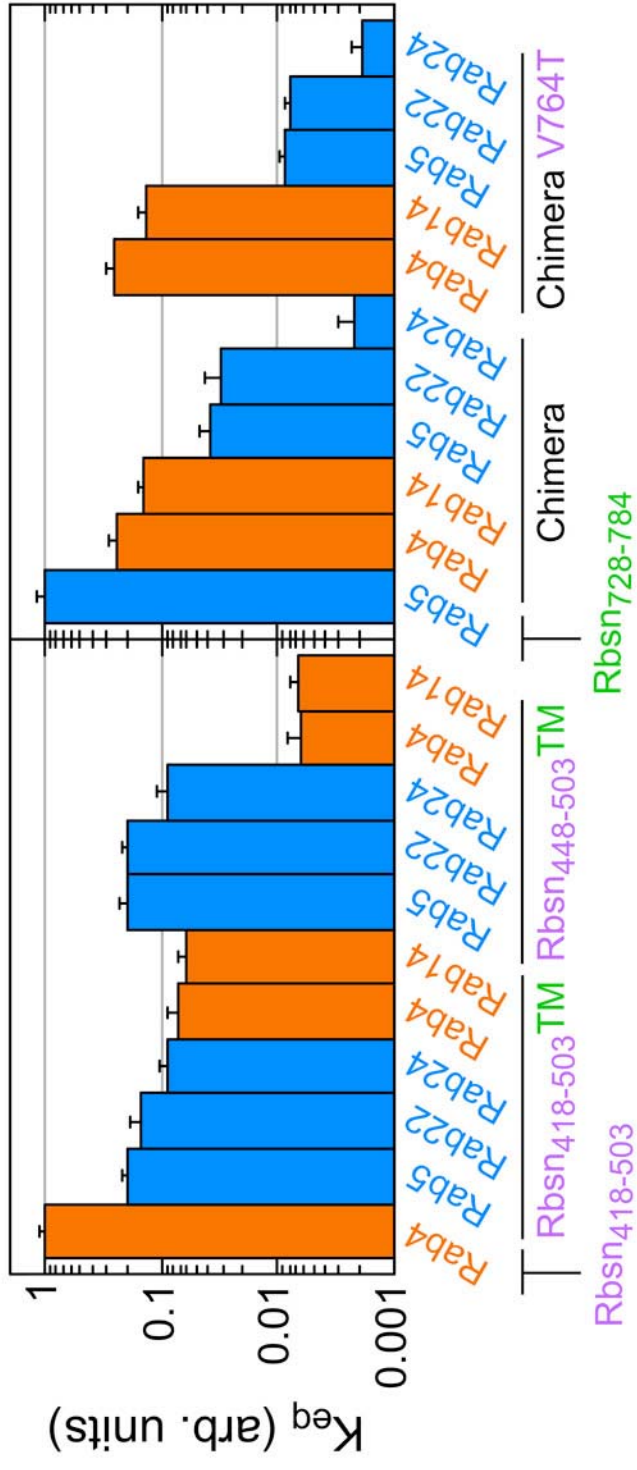

**Supplementary Figure 7.** Reversal of specificity mutations in the Rabenosyn-5 Rab binding domains. The affinities of 6xHis Rabenosyn-5 mutants for GST-fusions of Rab4, Rab5, Rab14, Rab22, and Rab24 were determined by SPR.
