# Supplementary material
Source: PubMed Central journal article supplement (PMC1360218)
Supplement: NIHMS4037-supplement-Supp_table_1.pdf [file NIHMS4037-supplement-Supp_table_1.pdf]

**Supplemental Table 1A. Rab Constructs**

| <b>Protein</b> | <b>Species</b> | <b>Accession Number</b> | <b>Residue Number</b> | <b>Cloning Vector</b> |
|----------------|----------------|-------------------------|-----------------------|-----------------------|
| Rab1A          | Human          | NM_030981               | 2-208                 | pGEX4T1               |
| Rab2A          | Human          | NM_002865               | 2-212                 | pGEX6P1               |
| Rab3A          | Mouse          | BI739240                | 2-220                 | modified pET15b       |
| Rab4A          | Human          | M_28211                 | 2-213                 | pGEX4T1               |
| Rab5C          | Mouse          | NM_004162               | 2-216                 | pGEX4T1               |
| Rab6A          | Human          | AA210997                | 2-208                 | pGEX4T1               |
| Rab7           | Mouse          | BI159347                | 2-207                 | pGEX4T1               |
| Rab8A          | Human          | NM_153317               | 2-207                 | pGEX4T1               |
| Rab9           | Mouse          | BC008160                | 2-201                 | pGEX6P1               |
| Rab10          | Human          | NM_016131               | 2-200                 | pGEX4T1               |
| Rab11A         | Human          | NM_017382               | 2-216                 | pGEX4T1               |
| Rab12          | Rat            | M83676                  | 2-209                 | pGEX4T1               |
| Rab13          | Human          | NM_002870               | 2-203                 | pGEX4T1               |
| Rab14          | Human          | NM_016322               | 2-215                 | pGEX6P1               |
| Rab15          | Mouse          | BF160330                | 2-212                 | pGEX4T1               |
| Rab17          | Human          | BC050426                | 2-212                 | pGEX4T1               |
| Rab18          | Human          | NM_021252               | 2-206                 | pGEX4T1               |
| Rab19          | Mouse          | AI050254                | 2-217                 | pGEX4T1               |
| Rab20          | Human          | BC026025                | 2-204                 | pGEX4T1               |
| Rab21          | Human          | NM_014999               | 16-225                | pGEX4T1               |
| Rab22A         | Mouse          | NM_020673               | 2-194                 | pGEX4T1               |
| Rab23          | Mouse          | NM_008999               | 2-237                 | pGEX4T1               |
| Rab24          | Mouse          | NM_130781               | 2-203                 | pGEX4T1               |
| Rab25          | Mouse          | NM_016899               | 2-213                 | pGEX4T1               |
| Rab26          | Human          | NM_014353               | 2-190                 | pGEX4T1               |
| Rab27B         | Human          | NM_004163               | 2-227                 | pGEX4T1               |
| Rab28          | Mouse          | XM_293673               | 2-221                 | pGEX4T1               |
| Rab29          | Rat            | NM_133590               | 2-203                 | pGEX4T1               |
| Rab30          | Human          | NM_014488               | 2-203                 | pGEX4T1               |
| Rab32          | Human          | NM_006834               | 22-195                | pGEX4T1               |
| Rab33B         | Mouse          | NM_016858               | 4-176                 | pGEX4T1               |
| Rab34          | Human          | NM_031934               | 2-259                 | pGEX4T1               |
| Rab35          | Human          | NM_006861               | 2-201                 | pGEX4T1               |
| Rab36          | Mouse          | XM_125709               | 2-267                 | pGEX4T1               |
| Rab37          | Human          | BC040547                | 2-223                 | pGEX4T1               |
| Rab38          | Human          | NM_022337               | 2-211                 | pGEX4T1               |
| Rab39          | Human          | NM_084662               | 2-217                 | pGEX4T1               |

**Supplemental Table1B. Constructs used for crystallization**

| <b>Constructs</b> | <b>Residue Number</b> | <b>Cloning Vector</b> | <b>N-terminal Residues derived from Tag</b> |
|-------------------|-----------------------|-----------------------|---------------------------------------------|
| Ypt1p             | 8-172                 | modified pET15b       | MGHHHHHHHGS                                 |
| Rab2A             | 2-170                 | pGEX6P1               | GPLGS                                       |
| Rab4A             | 2-172                 | pGEX6P1               | GPLGS                                       |
| Rab4A Q67L        | 18-185                | modified pET28a       | GS                                          |
| Rab5C             | 18-185                | pGEX4T1               | GS                                          |
| Rab6A             | 10-177                | pGEX4T1               | GS                                          |
| Rab9              | 4-175                 | pGEX6P1               | GPLGS                                       |
| Rab11A            | 8-175                 | modified pET15b       | MGHHHHHHHGS L V PRGS                        |
| Rab14             | 2-175                 | pGEX6P1               | GPLGS                                       |
| Rab21             | 16-183                | pGEX4T1               | GS                                          |
| Rab21             | 16-183                | modified pET15b       | MGHHHHHHHGS L V PRGS                        |
| Rab22A            | 2-169                 | pGEX4T1               | GS                                          |
| Rab22A Q64L*      | 2-169                 | modified pET28a       | GS                                          |
| Rab23             | 6-172                 | pGEX4T1               | GS                                          |
| Rab33             | 30-202                | modified pET15b       | MGHHHHHHHGS L V PRGS                        |
| Rabenosyn         | 458-503               | pGEX6P1               | GPLGS                                       |
| Rabenosyn         | 440-503               | pGEX6P1               | GPLGS                                       |
| Rabenosyn         | 728-784               | pGEX4T1               | GS                                          |

\* This construct contains an additional PCR-induced mutation, V22M, which has no effect on the affinity for Rabenosyn or EEA1 and no effect on the structure compared with the GppNHp-bound form of wild type Rab22A.
