# Supplementary material
Source: PubMed Central journal article supplement (PMC1360218)
Supplement: NIHMS4037-supplement-Supp_table_3.pdf [file NIHMS4037-supplement-Supp_table_3.pdf]

**Supplemental Table 3. Summary of Rab GTPase Structures Analyzed**

| Rab GTPase | Nucleotide     | PDB ID Code | Resolution (Å) | Relevant Figures | Reference* |
|------------|----------------|-------------|----------------|------------------|------------|
| Ypt1p      | GppNHp         | 1YZN        | 2.05           | SF1, SF3         | This study |
| Rab4A      | GppNHp         | 1YU9        | 2.05           | SF1, SF2, SF3    | This study |
| Rab4A      | GTP            | 1Z0K        | 1.80           | F3, F4, SF1, SF2 | This study |
| Rab6A      | GppNHp         | 1YZQ        | 1.78           | SF1, SF3         | This study |
| Rab9       | GppNHp         | 1YZL        | 1.85           | SF1, SF3         | This study |
| Rab11A     | GppNHp         | 1YZK        | 2.00           | SF1, SF2, SF3    | This study |
| Rab21      | GppNHp         | 1YZT        | 2.05           | SF1, SF2         | This study |
| Rab21      | GppNHp         | 1YZU        | 2.50           | SF1, SF2, SF3    | This study |
| Rab22A     | GppNHp         | 1YVD        | 1.90           | SF1, SF2, SF3    | This study |
| Rab22A     | GTP            | 1Z0J        | 1.30           | F3, F4, SF1, SF2 | This study |
| Rab33      | GppNHp         | 1Z06        | 1.80           | SF1, SF3         | This study |
| Rab2A      | GDP            | 1Z0A        | 2.12           | SF1, SF2         | This study |
| Rab5C      | GDP            | 1Z0D        | 2.20           | SF1, SF2         | This study |
| Rab14      | GDP            | 1Z0F        | 2.05           | SF1, SF2         | This study |
| Rab21      | GDP            | 1Z0I        | 2.30           | SF1, SF2         | This study |
| Rab23      | GDP            | 1Z22        | 2.06           | SF1, SF2         | This study |
| Rab23      | GDP            | 1Z2A        | 1.90           | SF1, SF2         | This study |
| Rab3A      | GppNHp         | 3RAB        | 2.03           | SF2, SF3         | 1          |
| Rab3A      | GTP            | 1ZBD        | 2.60           | SF2              | 2          |
| Rab5A      | GppNHp         | 1N6H        | 1.50           | SF2              | 3          |
| Rab5A      | GppNHp         | 1TU3        | 2.31           | SF2              | 4          |
| Rab5C      | GppNHp         | 1HUQ        | 1.80           | SF1, SF2, SF3    | 5          |
| Ypt51p     | GppNHp         | 1EK0        | 1.48           | SF3              | 6          |
| Rab7       | GppNHp         | 1VG8        | 1.70           | SF3              | 7          |
| Ypt7p      | GppNHp         | 1KY2        | 1.60           | SF3              | 8          |
| Rab11A     | GTP $\gamma$ S | 1OIW        | 2.05           | SF2              | 9          |
| Sec4p      | GppNHp         | 1G17        | 2.00           | SF3              | 10         |
| Rab5A      | GDP            | 1TU4        | 2.20           | SF2              | 4          |
| Rab7       | GDP            | 1VG1        | 1.90           | SF2              | 7          |
| Ypt7p      | GDP            | 1KY3        | 1.35           | SF2              | 8          |
| Rab9       | GDP            | 1S8F        | 1.70           | SF2              | 11         |
| Rab9       | GDP            | 1WMS        | 1.25           | SF2              | 12         |
| Rab11A     | GDP            | 1OIV        | 1.98           | SF2              | 9          |
| Sec4p      | GDP            | 1G16        | 1.80           | SF2              | 10         |

### \*References

1. Dumas, J. J., Zhu, Z., Connolly, J. L. & Lambright, D. G. Structural basis of activation and GTP hydrolysis in Rab proteins. *Structure Fold Des* **7**, 413-23 (1999).
2. Ostermeier, C. & Brunger, A. T. Structural basis of Rab effector specificity: crystal structure of the small G protein Rab3A complexed with the effector domain of rabphilin-3A. *Cell* **96**, 363-74 (1999).
3. Zhu, G. et al. High resolution crystal structures of human Rab5a and five mutants with substitutions in the catalytically important phosphate-binding loop. *J Biol Chem* **278**, 2452-60 (2003).
4. Zhu, G. et al. Structural basis of Rab5-Rabaptin5 interaction in endocytosis. *Nat Struct Mol Biol* **11**, 975-83 (2004).
5. Merithew, E. et al. Structural plasticity of an invariant hydrophobic triad in the switch regions of Rab GTPases is a determinant of effector recognition. *J Biol Chem* **276**, 13982-8 (2001).
6. Esters, H., Alexandrov, K., Constantinescu, A. T., Goody, R. S. & Scheidig, A. J. High-resolution crystal structure of *S. cerevisiae* Ypt51(DeltaC15)-GppNHp, a small GTP-binding protein involved in regulation of endocytosis. *J Mol Biol* **298**, 111-21 (2000).
7. Rak, A. et al. Structure of the Rab7:REP-1 complex: insights into the mechanism of Rab prenylation and choroideremia disease. *Cell* **117**, 749-60 (2004).
8. Constantinescu, A. T. et al. Rab-subfamily-specific regions of Ypt7p are structurally different from other RabGTPases. *Structure (Camb)* **10**, 569-79 (2002).
9. Pasqualato, S. et al. The structural GDP/GTP cycle of Rab11 reveals a novel interface involved in the dynamics of recycling endosomes. *J Biol Chem* **279**, 11480-8 (2004).
10. Stroupe, C. & Brunger, A. T. Crystal structures of a Rab protein in its inactive and active conformations. *J Mol Biol* **304**, 585-98 (2000).
11. Wittmann, J. G. & Rudolph, M. G. Crystal structure of Rab9 complexed to GDP reveals a dimer with an active conformation of switch II. *FEBS Lett* **568**, 23-9 (2004).
12. Chen, L. et al. High resolution crystal structure of human Rab9 GTPase: a novel antiviral drug target. *J Biol Chem* **279**, 40204-8 (2004).
